# Supplementary material for: Generation of TGFβR2(-1) neoantigen-specific HLA-DR4-restricted T cell receptors for cancer therapy
Source: PubMed Central journal article supplement — J Immunother Cancer. 2023 Feb 23;11(2):e006001. doi: 10.1136/jitc-2022-006001 (PMC9950979; doi:10.1136/jitc-2022-006001), 2023-02-23
Supplement: jitc-2022-006001supp001.pdf [file jitc-2022-006001supp001.pdf]

## SUPPLEMENTARY DATA

Supplementary Table 1

| B-LCL  | A*                          | B*                       | C*                          | DRA*     | DRB1*                       | DRB3*                       | DRB4*                       | DRB5* | DQA1*                       | DQB1*                       | DPA1*                       | DPB1*                       |
|--------|-----------------------------|--------------------------|-----------------------------|----------|-----------------------------|-----------------------------|-----------------------------|-------|-----------------------------|-----------------------------|-----------------------------|-----------------------------|
| BSM    | 02:01:01:01                 | 15:01:01:01              | 03:04:01:01                 | 01:01:01 | 04:01:01:01,<br>04:01:01:02 |                             | 01:03:01:01,<br>01:03:01:03 |       | 03:01:01                    | 03:02:01                    | 01:03:01:01                 | 02:01:02:01                 |
| BM14   | 03:01:01:01                 | 07:02:01:01              | 07:02:01:03                 | 01:01:01 | 04:01:01:02                 |                             | 01:03:01:11                 |       | 03:01:01                    | 03:02:01                    | 01:03:01:04                 | 04:01:01:01                 |
| MT14B  | 31:01:02:01                 | 40:01:02:01              | 03:04:01:01                 | 01:01:01 | 04:04:01                    |                             | 01:03:01:01,<br>01:03:01:03 |       | 03:01:01                    | 03:02:01                    | 01:03:01:05                 | 04:02:01:02                 |
| VAVY   | 01:01:01:01                 | 08:01:01:01              | 07:01:01:01                 | 01:02:02 | 03:01:01:01                 | 01:01:02:01,<br>01:01:02:02 |                             |       | 05:01:01:02                 | 02:01:01:01                 | 02:01:02:02                 | 01:01:01                    |
| KLO    | 01:01:01:01,<br>02:08       | 08:01:01:01,<br>50:01:01 | 06:02:01:02,<br>07:01:01:01 |          | 03:01:01:01,<br>07:01:01:01 | 01:01:02:01,<br>01:01:02:02 | 01:03:01:01,<br>01:03:01:03 |       | 02:01:01:01,<br>05:01:01:02 | 02:01:01,<br>02:02:01:01    | 01:03:01:02,<br>02:01:02:01 | 01:01:01,<br>104:01         |
| KAS011 | 01:01:01:01                 | 37:01:01:01              | 06:02:01:01                 | 01:01:01 | 16:01:01                    |                             |                             | 02:02 | 01:02:02:01                 | 05:02:01:01                 | 01:03:01:02,<br>02:01:01:02 | 04:01:01:01,<br>14:01:01:01 |
| WIN    | 01:01:01:01                 | 57:01:01:01              | 06:02:01:01                 | 01:01    | 07:01:01:01,<br>07:01:01:02 |                             | 01:01                       |       | 02:01:01:01,<br>02:01:01:02 | 02:02:01:01,<br>03:03:02:01 | 01:03:01:02,<br>02:01:04    | 04:01:01:01,<br>13:01:01:01 |
| TISI   | 24:02:01:01                 | 35:08:01                 | 04:01:01:06                 | 01:01:01 | 11:03:01                    | 02:02                       |                             |       | 05:05:01:01,<br>05:05:01:02 | 03:01:01                    | 01:03:01:05                 | 04:02:01:02                 |
| SPO    | 02:01:01:01                 | 44:02:01:01              | 05:01:01:02                 | 01:01:01 | 11:01:01:01                 | 02:02:01:02                 |                             |       | 01:02:02                    | 05:02:01                    | 01:03:01:01                 | 02:01:02                    |
| HOR    | 33:03:01:02                 | 44:02:01:01              | 14:03                       | 01:02:02 | 13:02:01                    | 03:01:01                    |                             |       | 01:02:01:09                 | 06:04:01:01                 | 01:03:01:01                 | 04:01:01:26                 |
| AMALA  | 02:17:02:01                 | 15:01:01:01              | 03:03:01:01                 | 01:02:02 | 14:02:01:01                 | 01:01:02:05                 |                             |       | 05:03:01:01                 | 03:01:01:01                 | 01:03:01:15                 | 04:02:01:02                 |
| KAS116 | 24:02:01:01                 | 51:01:01:03              | 12:03:01:01                 | 01:01:01 | 01:01:01                    |                             |                             |       | 01:01:01:01                 | 05:01:01                    | 02:01:01:01                 | 13:01:01:01                 |
| DJS    | 02:01:01:01,<br>03:01:01:01 | 37:01:01,<br>35:01:01:02 | 04:01:01:01,<br>06:02:01:01 |          | 01:01:01,<br>16:01:01       |                             |                             | 02:02 | 01:01:01:01,<br>01:02:02    | 05:02:01,<br>05:01:01:03    | 01:03:01:02,<br>01:03:01:05 | 04:01:01:01,<br>04:02:01:02 |
| WT24   | 02:01:01:01                 | 27:05:02                 | 02:02:02:01                 |          | 16:01:01                    |                             |                             | 02:02 |                             | 05:02:01                    | 01:03:01:03                 | 03:01:01                    |
| KE     | 02:03:01,<br>11:01:01:01    | 38:02:01,<br>15:02:01:01 | 08:01:01,<br>07:02:01:01    |          | 04:05:01,<br>08:14:01       |                             | 01:03:01:01                 |       | 03:03:01,<br>01:03:01:05    | 04:01:01,<br>06:01:01       | 02:02:02                    | 02:02,<br>05:01:01          |
| SA     | 24:02:01:01                 | 07:02:01:01              | 07:02:01:03                 | 01:01:01 | 01:01:01                    |                             |                             |       | 01:01:01                    | 05:01:01                    | 01:03:01:05                 | 04:02:01:02                 |

Table 1. HLA allotypes of the LCL obtained from IPD-IMGT/HLA - Human Leukocyte Antigen Sequence Database (Robinson et al., 2020).

## Supplementary Table 2

Peptide sequences containing the TCR1414\_1 and TCR1414\_2 recognition motifs.

| Peptides containing the TCR1414_1 recognition motif x-x-L-M-x-x-M-T-x-x-x-x-x-x |                                                         |                  |                    |
|---------------------------------------------------------------------------------|---------------------------------------------------------|------------------|--------------------|
| Peptide nr                                                                      | Protein name                                            | Peptide sequence | Affinity IC50 (nM) |
| 1                                                                               | Bardet-Biedl syndrome 2 protein                         | arLMrdMkTmksrym  | 261                |
| 2                                                                               | Calcium-activated potassium channel subunit $\alpha$ -1 | ylLMvtMsTvgygdv  | 226                |
| 3                                                                               | Ribosomal protein S6 kinase alpha-1                     | gvLMfeMITgslpfq  | 154                |
| 4                                                                               | Ribosomal protein S6 kinase alpha-3                     | gvLMfeMITgtlpfq  | 152                |
| 5                                                                               | Ribosomal protein S6 kinase beta-2                      | gaLMydMITgspfft  | 291                |
| 6                                                                               | Dual 3',5'-cyclic-AMP and -GMP phosphodiesterase 11A    | cqLMfaMITtagfqd  | 165                |
| 7                                                                               | Zinc finger protein PLAGL1                              | ykLMrhMaThspqks  | 61                 |
| 8                                                                               | Transmembrane protein 131-like                          | yiLMefMkTrqrqna  | 260                |
| 9                                                                               | Ufm1-specific protease 2                                | idLMleMsTslaavt  | 110                |

| Peptide containing the TCR1414_2 recognition motif x-x-L-M-x-x-M-T-x-x-x-x-x-x |                                              |                  |                    |
|--------------------------------------------------------------------------------|----------------------------------------------|------------------|--------------------|
| Peptide nr                                                                     | Protein name                                 | Peptide sequence | Affinity IC50 (nM) |
| 10                                                                             | Rho guanine nucleotide exchange factor 28    | sfLMnrMTsprnksk  | 143                |
| 11                                                                             | Glucosidase 2 subunit beta (80K-H protein)   | eyLMelMTpaacpep  | 201                |
| 12                                                                             | Heat shock protein 105 kDa                   | lrLMndMTavalnyg  | 125                |
| 13                                                                             | PAN2-PAN3 deadenylation complex subunit PAN3 | ypLMqrMTnssssps  | 76                 |
| 14                                                                             | Prostatic acid phosphatase (PAP)             | rtLMsaMTnlaalfp  | 17                 |
| 15                                                                             | Toll-like receptor 7                         | lfLMvmMTashlyfw  | 120                |

## Supplementary Figure 1

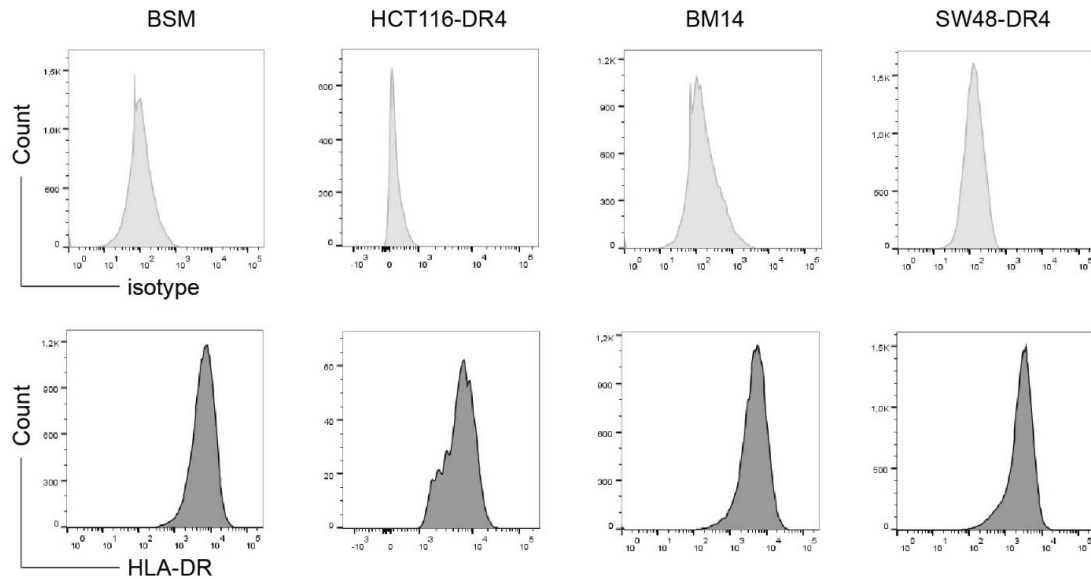**Supplementary Figure 1. HLA-DR expression in tumor and lymphoblastoid cell lines.**

Tumor cell lines SW48-DR4, HCT-DR4 and LCL cells BSM, BM14 were stained for HLA-DR (dark grey) or isotype control (light grey) and were measured by flow cytometry.
